# Supplementary material
Source: PubMed Central journal article supplement (PMC4136036)
Supplement: AAC.03071-14_zac008143149so1.pdf [file AAC.03071-14_zac008143149so1.pdf]

1 **Supplementary Information for**

2

3 **Differential protection from tobramycin by extracellular polymeric**  
4 **substances from *Acinetobacter baumannii* and *Staphylococcus aureus***  
5 **biofilms**

6

7 Emily K. Davenport <sup>a</sup>, Douglas R. Call <sup>b</sup>, Haluk Beyenal <sup>a#</sup>

8

9 <sup>a</sup> Gene and Linda Voiland School of Chemical Engineering and Bioengineering, Washington  
10 State University, Pullman, WA, USA.

11 <sup>b</sup> Paul G. Allen School for Global Animal Health, Washington State University, Pullman, WA,  
12 USA.

13

14 Running head: Extracellular polymeric substance protects cells from tobramycin

15

16 #Address correspondence to Haluk Beyenal, Gene and Linda Voiland School of Chemical  
17 Engineering and Bioengineering, Washington State University, Wegner Hall - Room 355,  
18 Pullman, WA 99163. beyenal@wsu.edu 509-334-0896

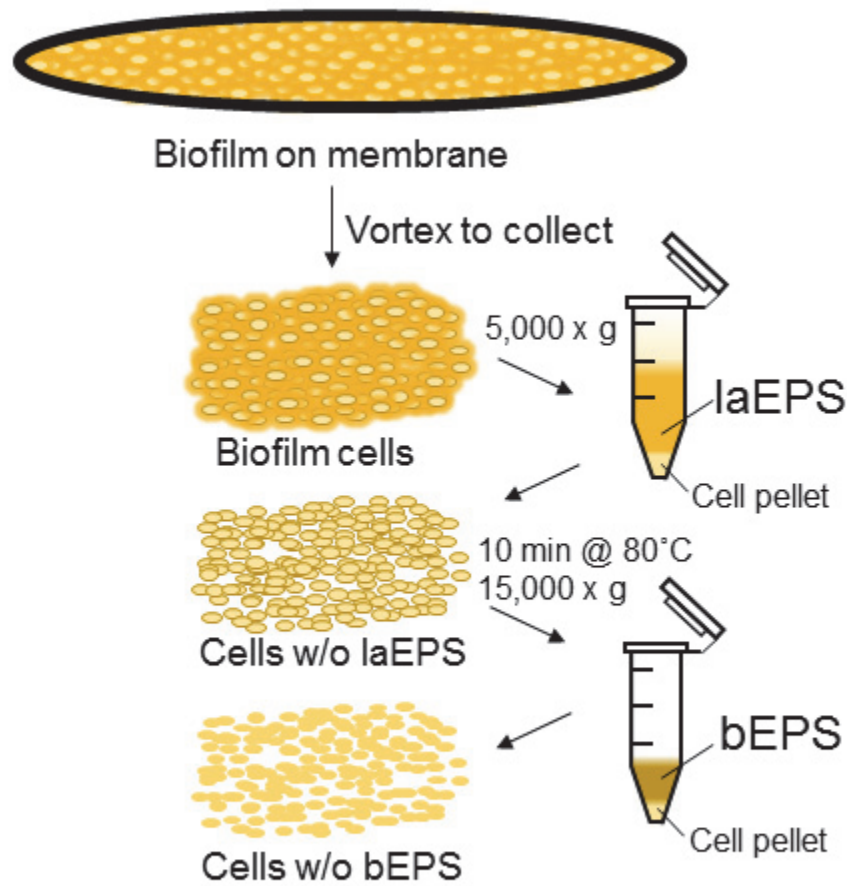

19

20 Figure S1. EPS harvesting method. Membrane from the membrane bioreactor is vortexed to  
 21 collect biofilm. Cells are then centrifuged at 5,000  $\times g$  to collect laEPS. The cell pellet is  
 22 resuspended in 0.9% NaCl solution, heated for 10 min at 80°C, and centrifuged at 15,000  $\times g$  to  
 23 collect bEPS.

24

25

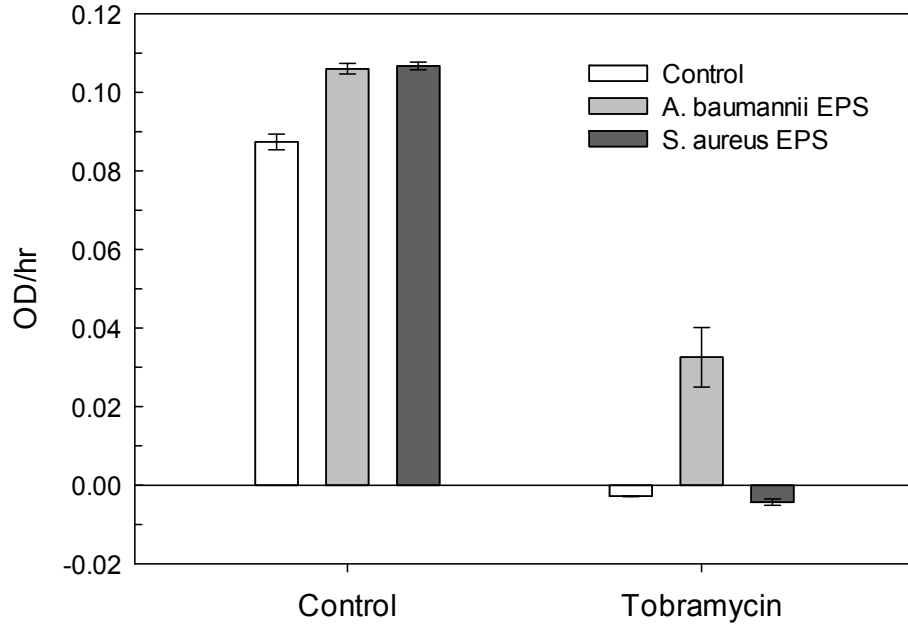

26

27 Figure S2. EPS from both *A. baumannii* and *S. aureus* were added with tobramycin to *E. coli* K-  
28 12 cultures. When tobramycin was added, only cultures containing *A. baumannii* EPS showed  
29 growth. EPS from *S. aureus* did not have any effect on *E. coli* growth when tobramycin was  
30 present. Error bars represent one standard deviation.

31

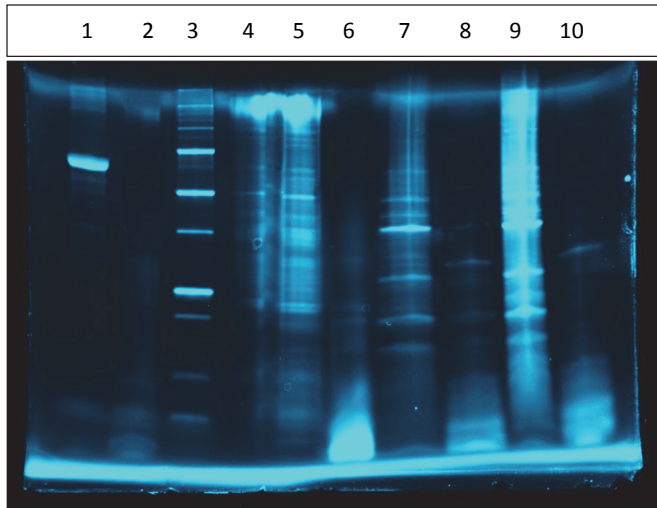

32

33 Figure S3. SDS-PAGE of *A. baumannii* EPS digestion by proteinase K. Lane 1: bovine serum  
34 albumin (BSA) control; lane 2: BSA digest; lane 3: ladder; lane 4: empty; lane 5: EPS control;  
35 lane 6: EPS digest; lane 7: laEPS control; lane 8: laEPS digest; lane 9: bEPS control; lane 10:  
36 bEPS digest.

37

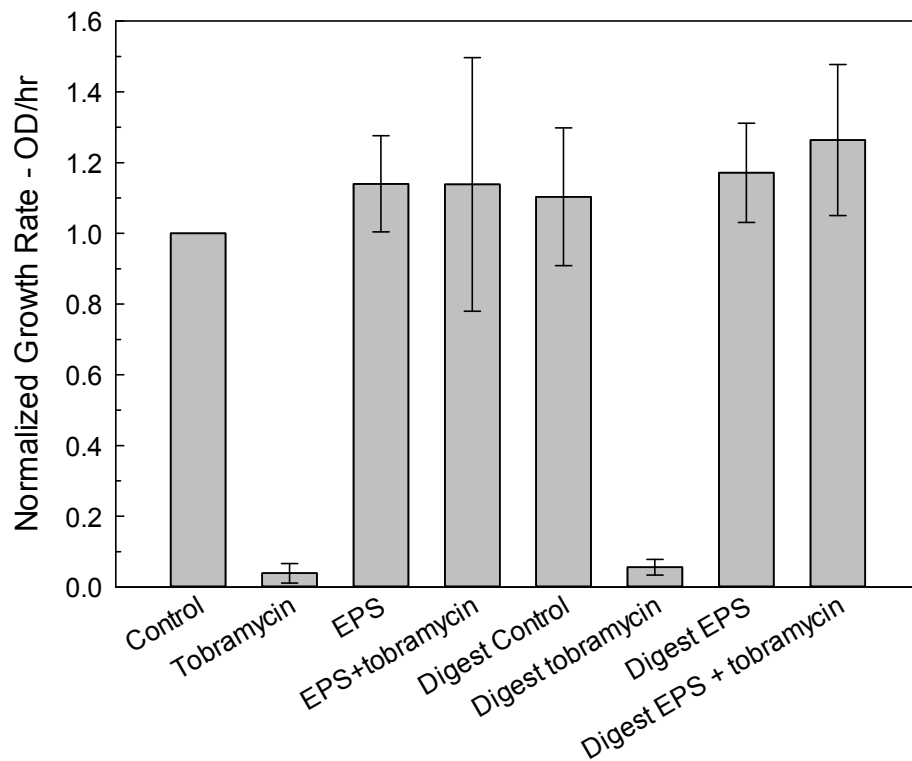

38

39 Figure S4. Effects of an overnight proteinase K digest on *A. baumannii* EPS. Digested EPS did  
 40 not show a significant difference in protection from tobramycin from the untreated EPS samples.

41 Error bars represent one standard deviation.

42

43

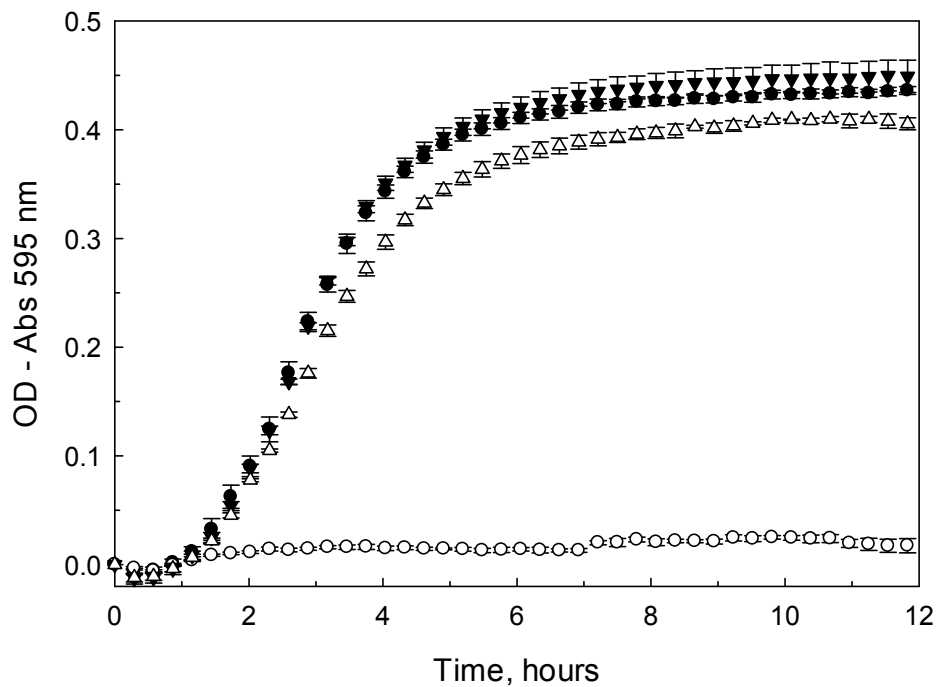

44  
 45 Figure S5. Loosely associated EPS used as EPS fraction in *A. baumannii* cultures. Growth curves  
 46 for *A. baumannii* that was cultured in 0.33× TSB alone (●), with 1 μg/mL tobramycin (○), with  
 47 50% (v/v) *A. baumannii* laEPS (▼), or with both tobramycin and laEPS (Δ). Error bars represent  
 48 one standard deviation and **may not be visible behind the symbol.**
